# Supplementary material for: Urine Metabolomic Profile of Breast- versus Formula-Fed Neonates Using a Synbiotic-Enriched Formula
Source: MDPI journal article supplement (doi:10.3390/ijms231810476), 2022-09-09
Supplement: s1 [file s1]

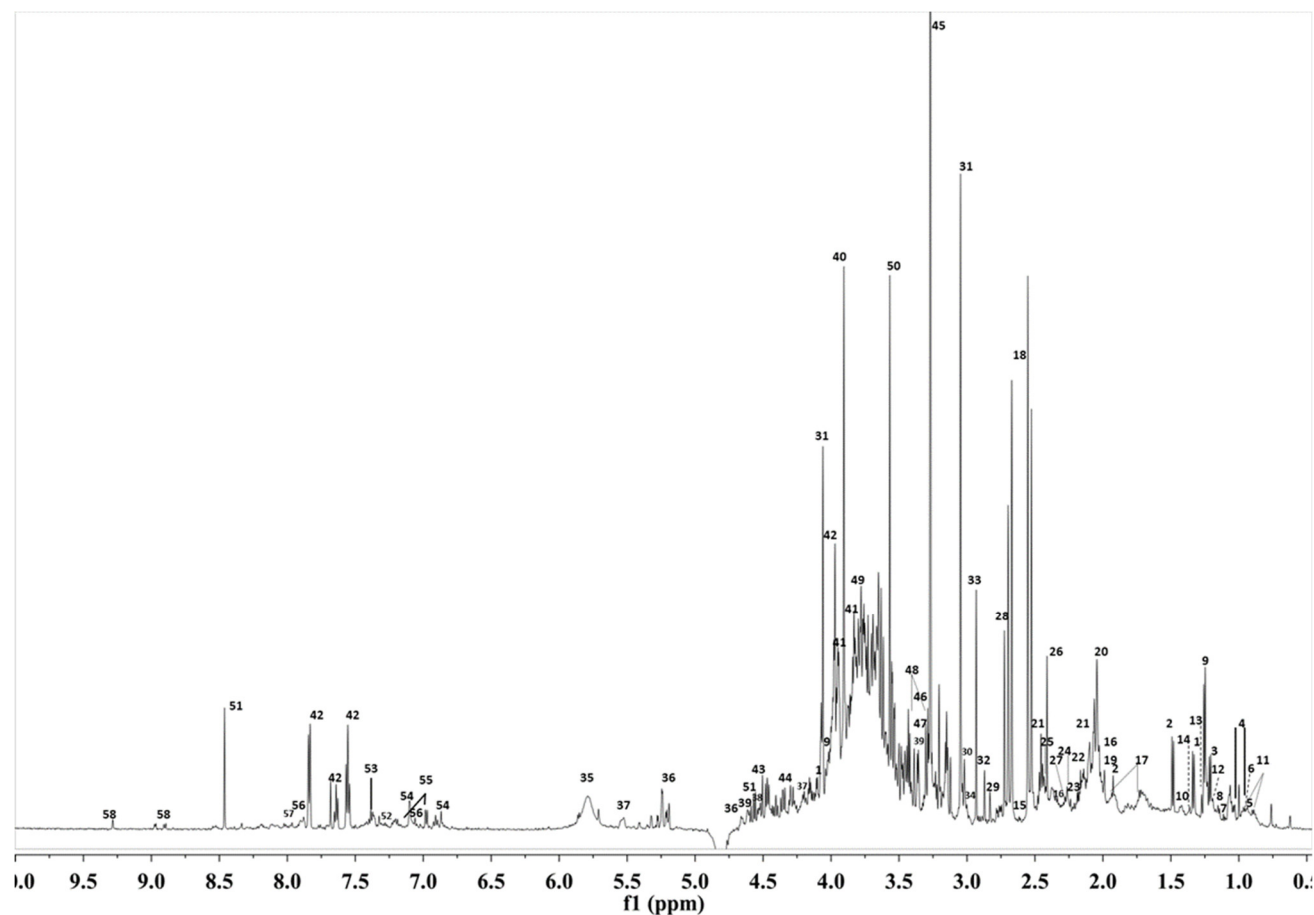

**Figure S1.**  $^1\text{H}$  NMR spectra of a urine sample with annotation on the identified metabolites. 1:lactate; 2:alanine; 3:3-amino-isobutyrate; 4:valine; 5:isoleucine; 6:leucine; 7:isobutyrate; 8: succinic acid; 9:L-fucose; 10:lysine; 11:bile acids (2-hydroxybutyrate); 12:3-methyl-2-oxovalerate; 13:3-hydroxyisovalerate; 14:2-hydroxyisobutyrate. 15: $\beta$ -alanine; 16:2-hydroxyglutarate; 17:lysine; 18:citrate; 19:acetate; 20:N-acetylaspartate; 21:L-glutamine; 22:acetone; 23:aminoadipate; 24:acetoacetate; 25:pyroglutamate; 26:pyruvate; 27:isobutyrate; 28:dimethylamine; 29:methylguanidine; 30:creatine; 31:creatinine; 32:trimethylamine; 33:dimethylglycine; 34: isocitrate; 35:urea; 36:D-glucose; 37:sucrose; 38: L-cystine; 39:gluconate; 40:glycolate; 41:serine; 42:hippurate; 43:trigonelline; 44:threonine; 45:choline; 46:trimethylamine-N-oxide; 47:betaine; 48:taurine; 49:guanidoacetate; 50:glycine; 51:formate; 52: $\tau$ -methylhistidine; 53:N-phenylacetylglutamine; 54:phenol; 55:tyrosine; 56:histidine; 57:  $\pi$ -methylhistidine, 58: trigonelline

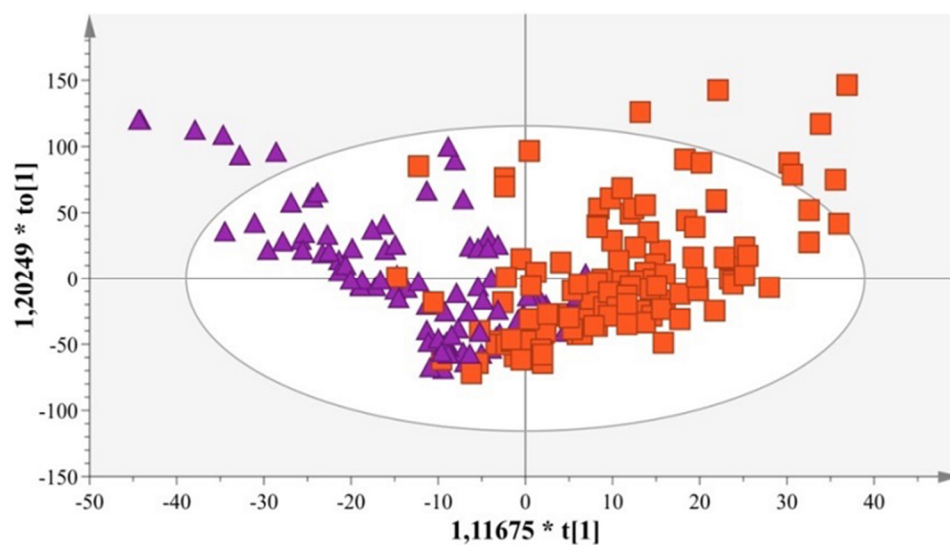

**Figure S2.** OPLS-DA scores plot (breast vs formula-fed), with  $A=1+1+0$ ,  $N=225$ ,  $R^2X(\text{cum})=0.52$ ,  $R^2Y(\text{cum})=0.51$ ,  $Q^2(\text{cum})=0.44$  for pareto scaling and 95% confidence level,  $p\text{-value}= 6,27\text{E-}33$ . (breast-fed samples: squares, formula-fed samples: triangles).

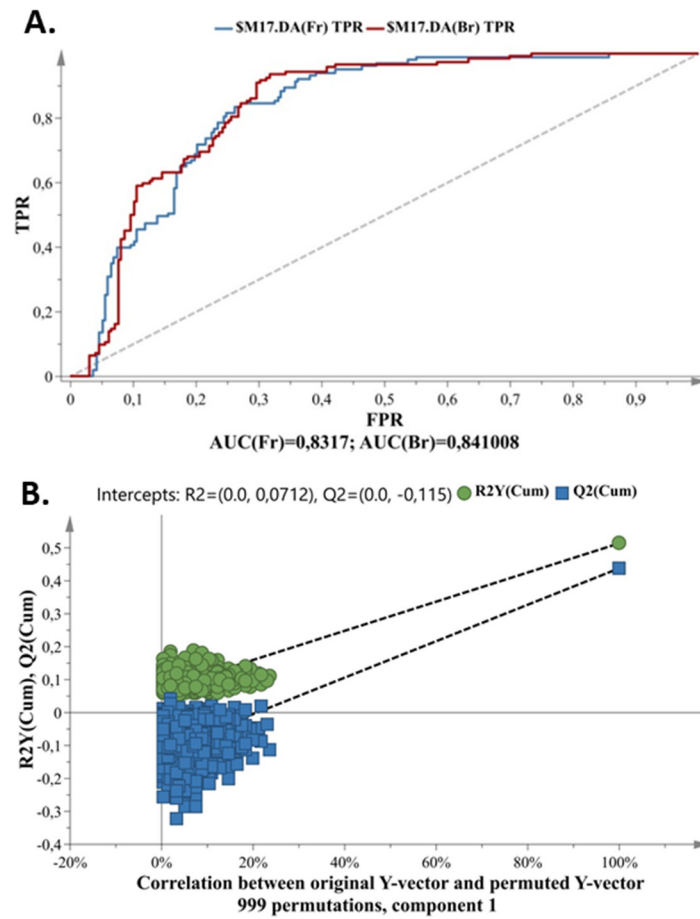

**Figure S3. (a)** ROC curve AUC (Synbiotic formula) = 0.8317 and AUC(Breastfeeding)=0.841 **(b)** Permutation testing for the OPLS-DA model in Figure S2, Synbiotic formula vs Breastfeeding.

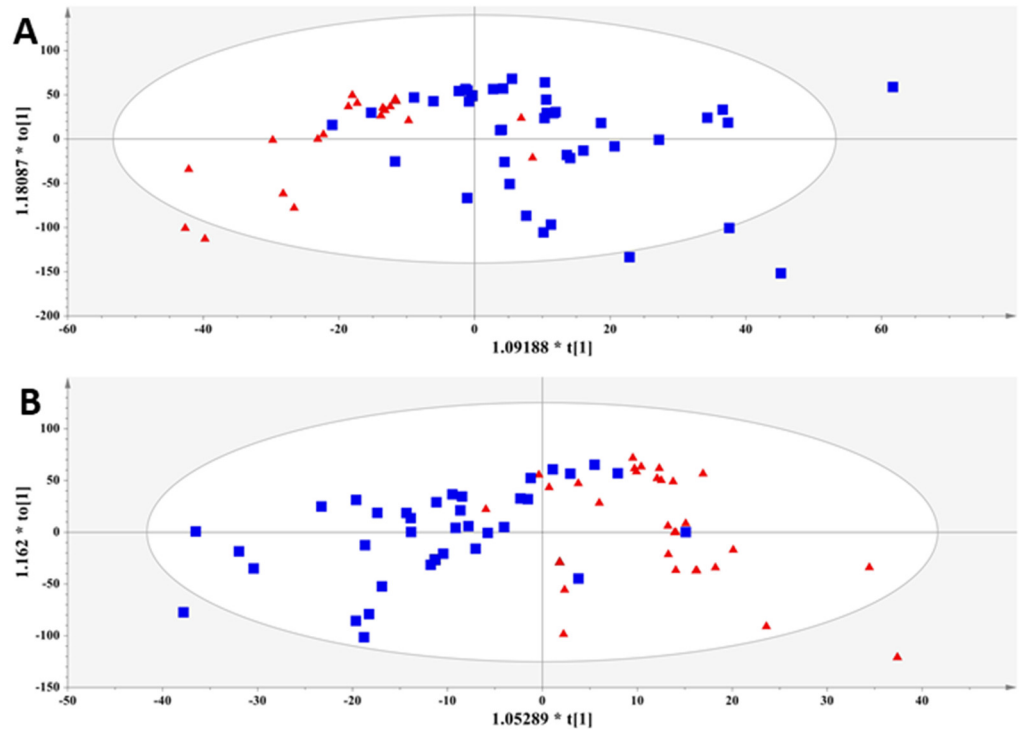

**Figure S4. (a)** OPLS-DA scores plot for day 3 regarding breast- and formula-fed samples, with  $A=1+1+0$ ,  $N=64$ ,  $R^2X(\text{cum})=0.61$ ,  $R^2Y(\text{cum})=0.46$ ,  $Q^2(\text{cum})=-0.23$  for pareto scaling and 95% confidence level,  $p\text{-value}>0.05$ . (Breast-fed samples: blue squares, formula-fed samples: red triangles); **(b)** OPLS-DA scores plot for day 15 regarding breast- and formula-fed samples, with  $A=1+1$ ,  $N=67$ ,  $R^2X(\text{cum})=0.61$ ,  $R^2Y(\text{cum})=0.55$ ,  $Q^2(\text{cum})=0.17$  for pareto scaling and 95% confidence level,  $p\text{-value}>0.05$ . (Breast-fed samples: blue squares, formula-fed samples: red triangles)

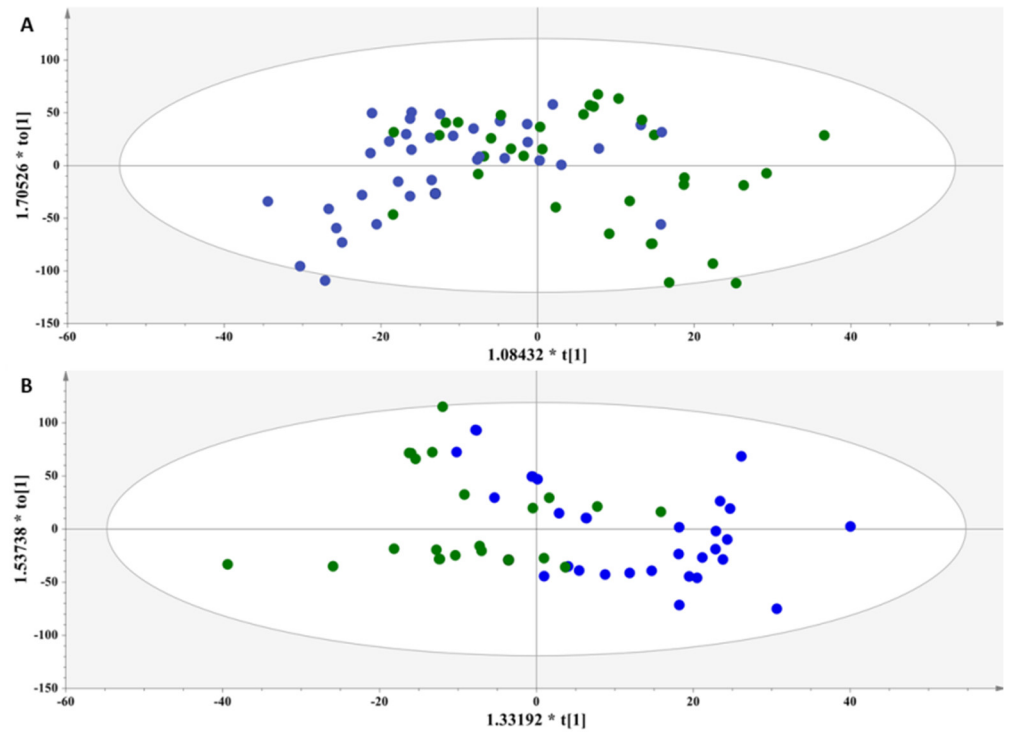

**Figure S5. (a)** OPLS-DA scores plot for breast-fed samples regarding day 3 and day 15, with  $A=1+1+0$ ,  $N=64$ ,  $R^2X(\text{cum})=0.61$ ,  $R^2Y(\text{cum})=0.46$ ,  $Q^2(\text{cum})=-0.23$  for pareto scaling and 95% confidence level,  $p\text{-value}>0.05$ . . (Breast-fed samples: blue squares, formula-fed samples: red triangles); **(b)** OPLS-DA scores plot for formula-fed samples regarding day 3 and day 15, with  $A=1+1$ ,  $N=67$ ,  $R^2X(\text{cum})=0.61$ ,  $R^2Y(\text{cum})=0.55$ ,  $Q^2(\text{cum})=0.17$  for pareto scaling and 95% confidence level,  $p\text{-value}>0.05$ . (Breast-fed samples: blue squares, formula-fed samples: red triangles)

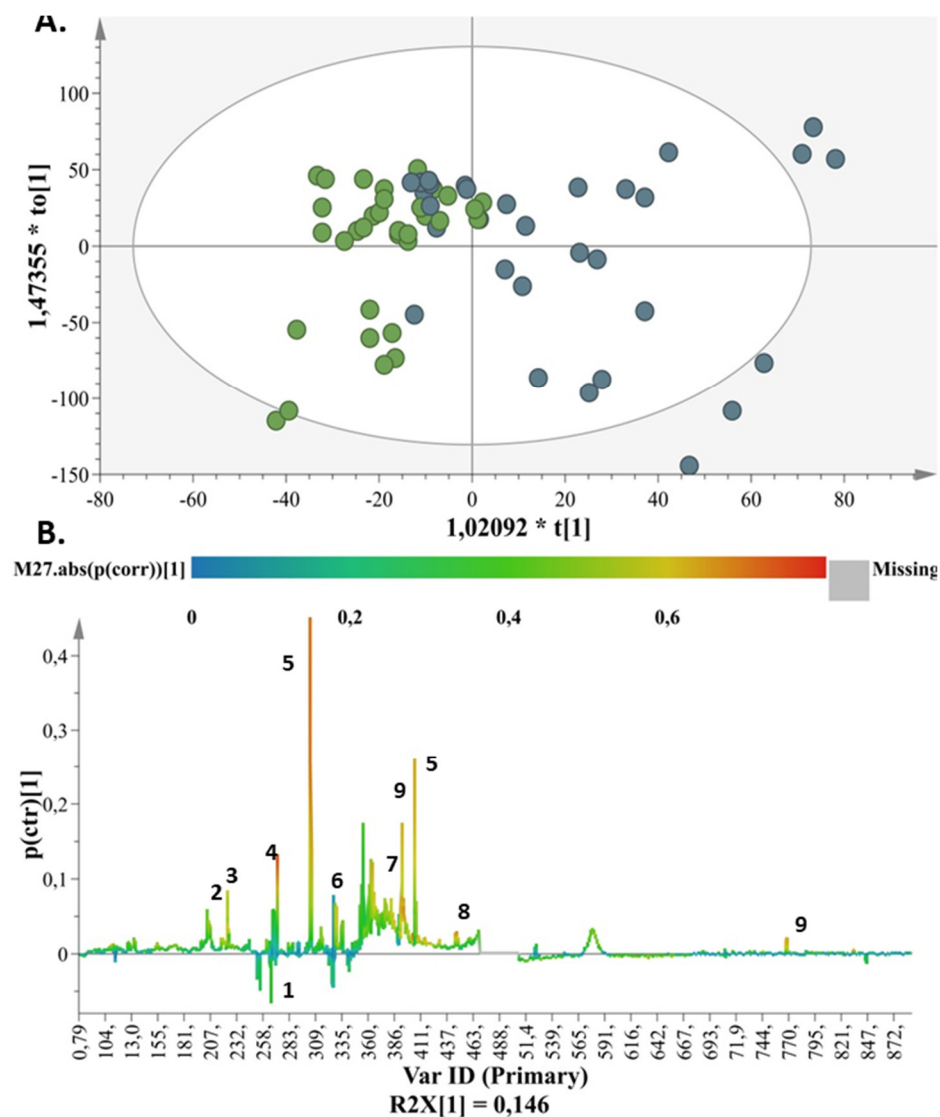

**Figure S6. (a)** OPLS-DA scores plot for breast-fed samples (day 3 vs month 2), with  $A=1+1+0$ ,  $N=64$ ,  $R^2X(\text{cum})=0,61$ ,  $R^2Y(\text{cum})=0,48$ ,  $Q^2(\text{cum})=0,33$ , for pareto scaling and 95% confidence level,  $p\text{-value}=3,32E-05$ . (day 3: blue circles, month 2: green circles); **(b)** S-line plot demonstrates the metabolites responsible for discrimination (1. citric acid, 2. glutamine, 3. acetoacetate, 4. dimethylamine, 5. creatinine, 6. betaine, 7. taurine, 8. threonine, 9. hippurate).

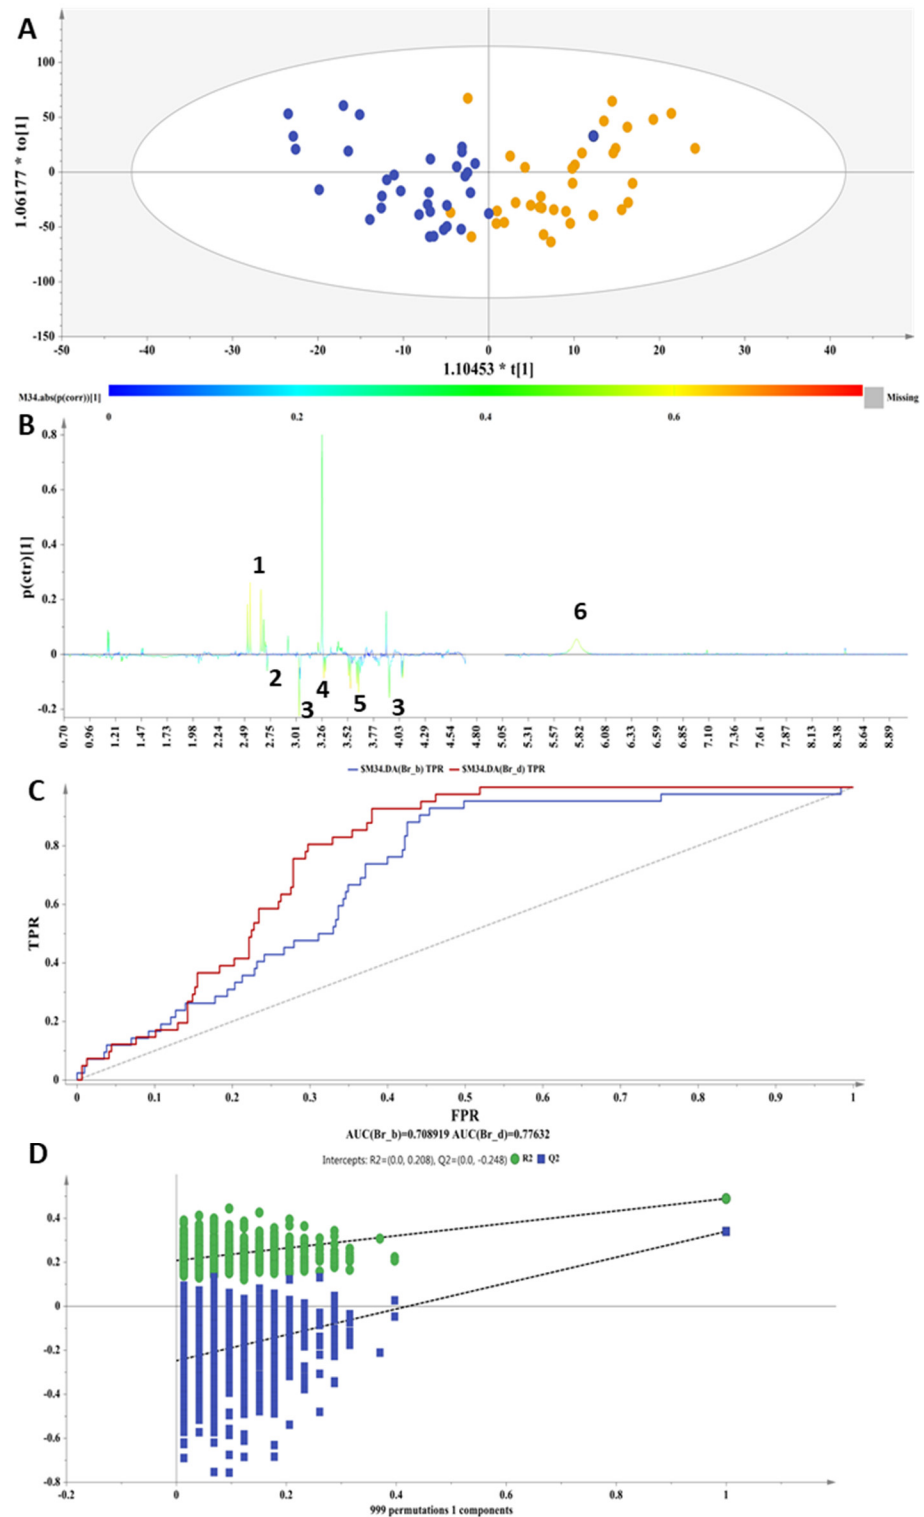

**Figure S7.** (a) OPLS-DA scores plot for breast-fed samples regarding day 15<sup>th</sup> and month 3, with  $A=1+1+0$ ,  $N=67$ ,  $R^2X(\text{cum})=0.55$ ,  $R^2Y(\text{cum})=0.49$ ,  $Q^2(\text{cum})=0.34$  for pareto scaling and 95% confidence level,  $p\text{-value}=9.21236e-006$ . (yellow squares: month 3, blue squares: day 15); (b) S-line plot demonstrates the metabolites responsible for discrimination. 1. citric acid, 2. dimethylamine, 3. Betaine, 4. Creatinine, 5. taurine, 6. urea. (c) ROC curve AUC (15<sup>th</sup> day) = 0.709 and AUC (3<sup>rd</sup> month) = 0.776; (d) permutation testing for the OPLS-DA model for breast-fed 15<sup>th</sup> day vs 3<sup>rd</sup> month.

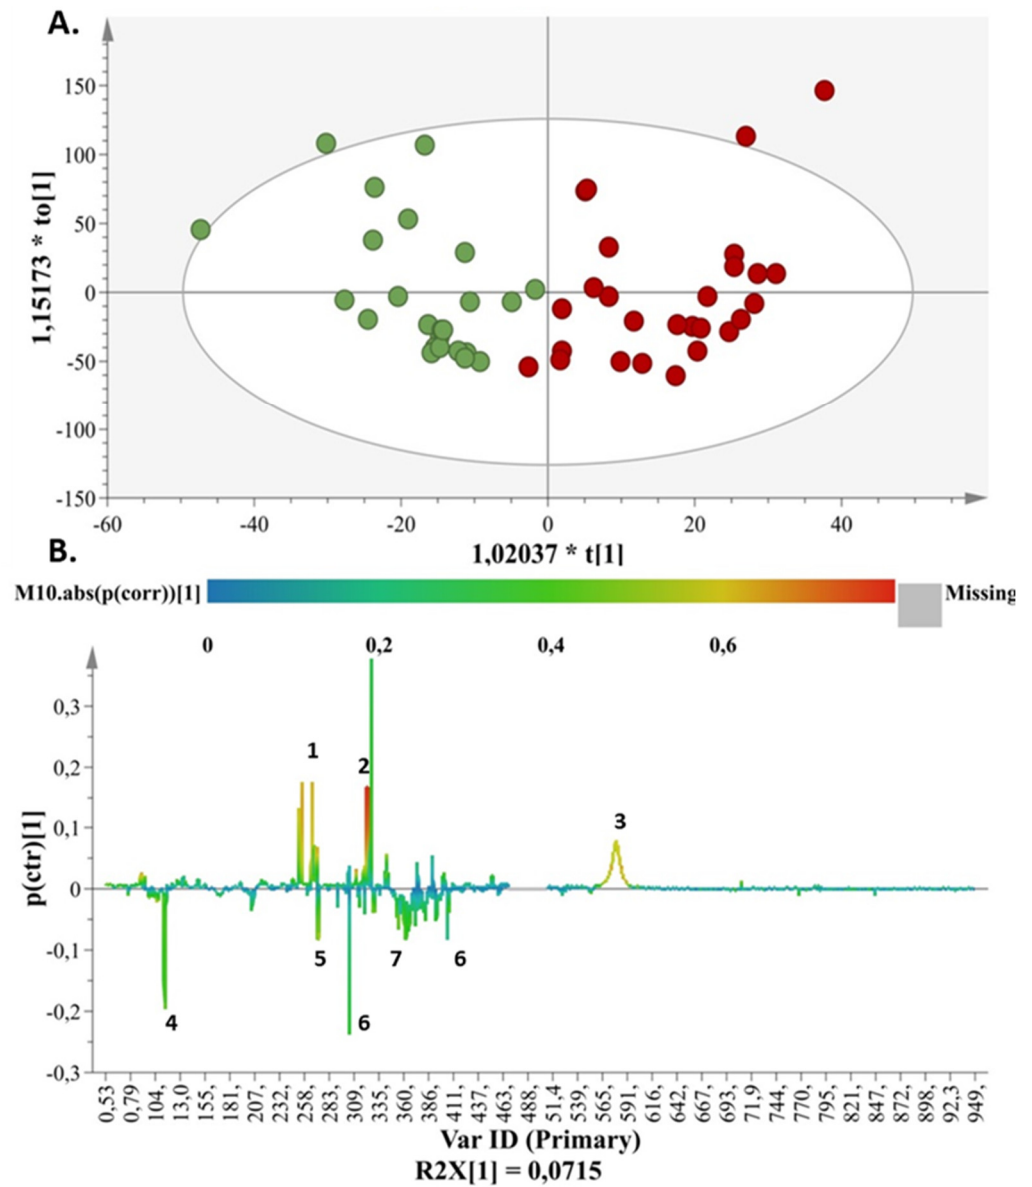

**Figure S8.** (a) OPLS-DA scores plot for formula-fed samples (day 3 vs month 2), with  $A=1+1+0$ ,  $N=53$ ,  $R^2X(\text{cum})=0.53$ ,  $R^2Y(\text{cum})=0.75$ ,  $Q^2(\text{cum})=0.55$  for pareto scaling and 95% confidence level,  $p\text{-value}=7.33\text{E-}12$ , (day 3: green circles, month 2: red circles); (b) S-line plot demonstrates the metabolites responsible for discrimination. (1. citric acid, 2. betaine, 3. urea, 4. methyl succinate, 5. dime-thylamine, 6. creatinine, 7. Taurine).



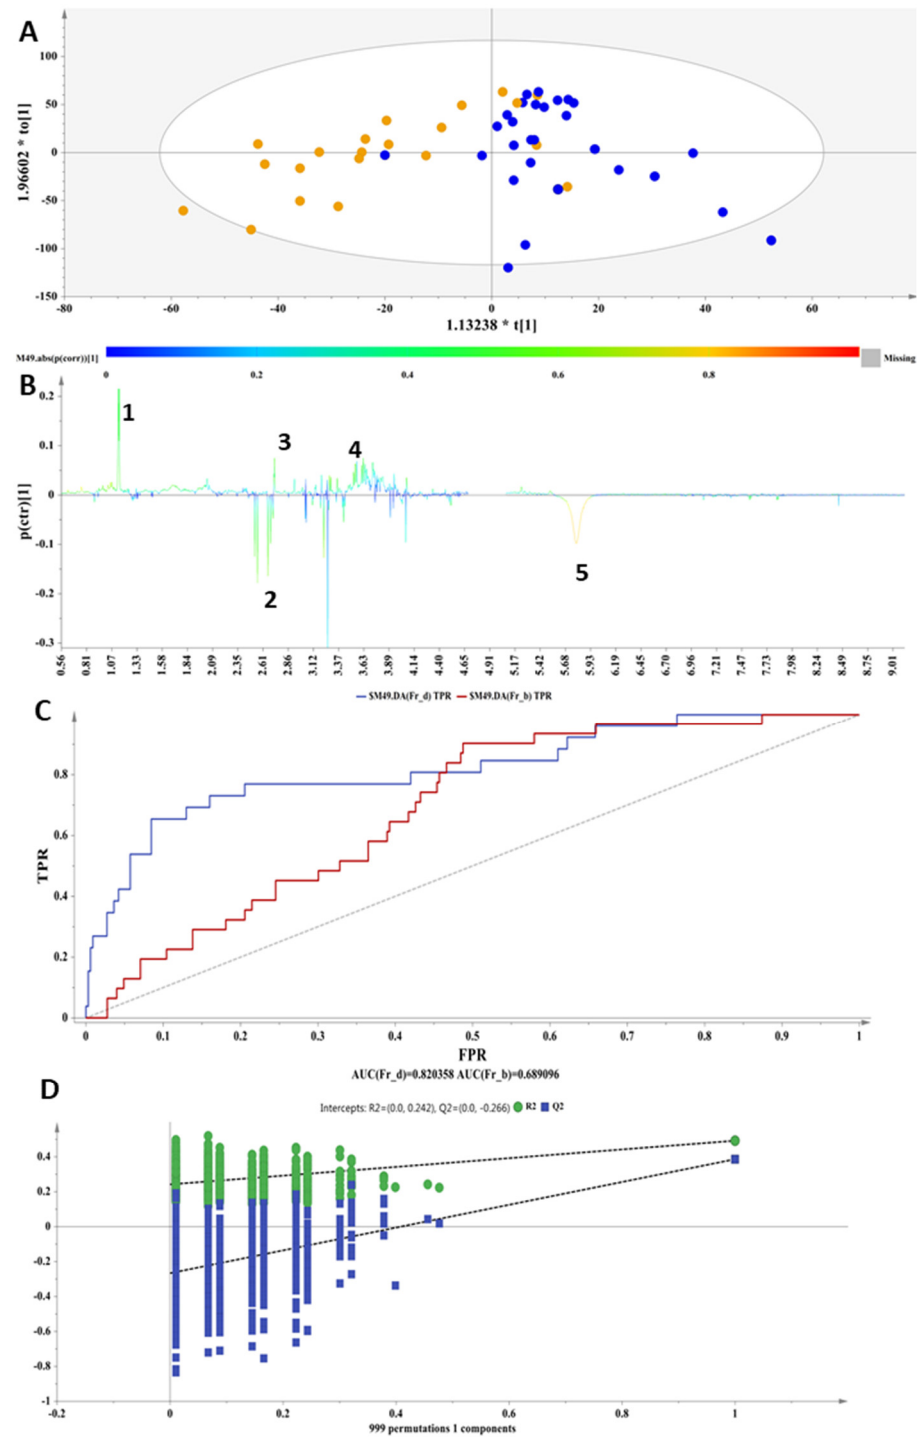

**Figure S9.** (a) OPLS-DA scores plot for formula-fed samples regarding day 15<sup>th</sup> and month 3, with  $A=1+1+0$ ,  $N=50$ ,  $R^2X(\text{cum})=0.59$ ,  $R^2Y(\text{cum})=0.49$ ,  $Q^2(\text{cum})=0.39$  for pareto scaling and 95% confidence level,  $p\text{-value}=8.3714\text{e-}005$ . (yellow squares: month 3, blue squares: day 15); (b) S-line plot demonstrates the metabolites responsible for discrimination. 1. methyl succinate, 2. citric acid, 3. dime-thylamine, 4. Taurine, (c) ROC curve AUC (15<sup>th</sup> day) = 0.689 and AUC (3<sup>rd</sup> month) = 0.820; (d) per-mutation testing for the OPLS-DA model formula-fed 15<sup>th</sup> day vs 3<sup>rd</sup> month.

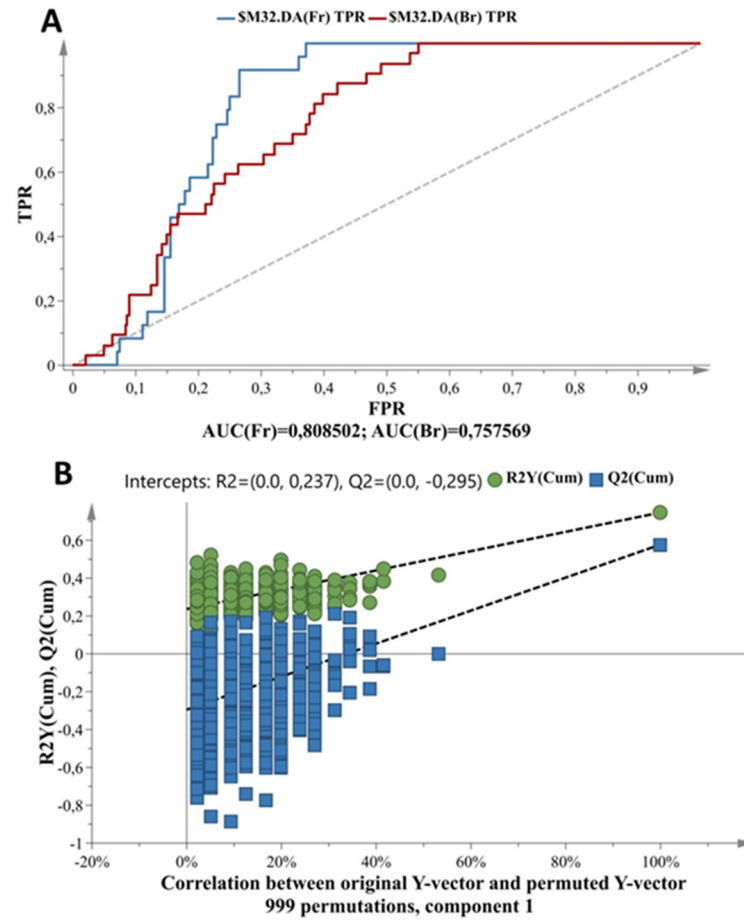

**Figure S10. (a)** ROC curve AUC 2<sup>nd</sup> month (Formula-fed) = 0.808 and AUC (Breast Fed) =0.757; **(b)** permutation testing for the OPLS-DA model for formula-fed 3rd day vs 15th day.

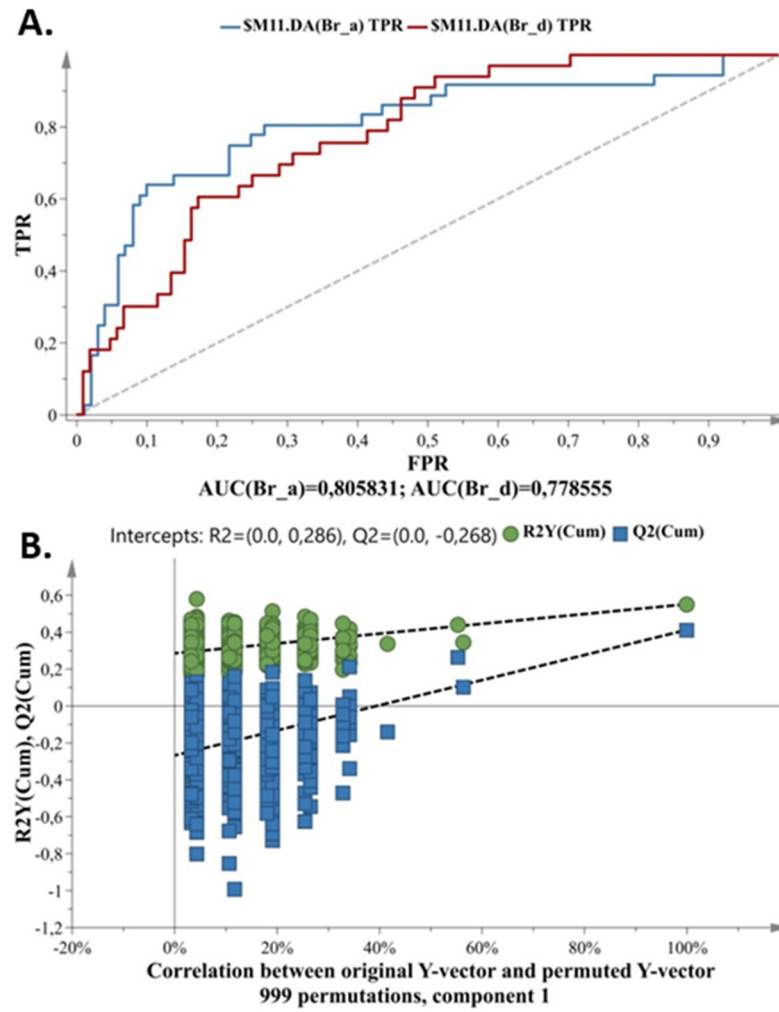

**Figure S11.** (a) ROC curve AUC (Breastfeeding day 3)=0.805 and AUC (Breastfeeding 3<sup>rd</sup> month)=0.778, (b) permutation testing for the OPLS-DA model in Figure 3.

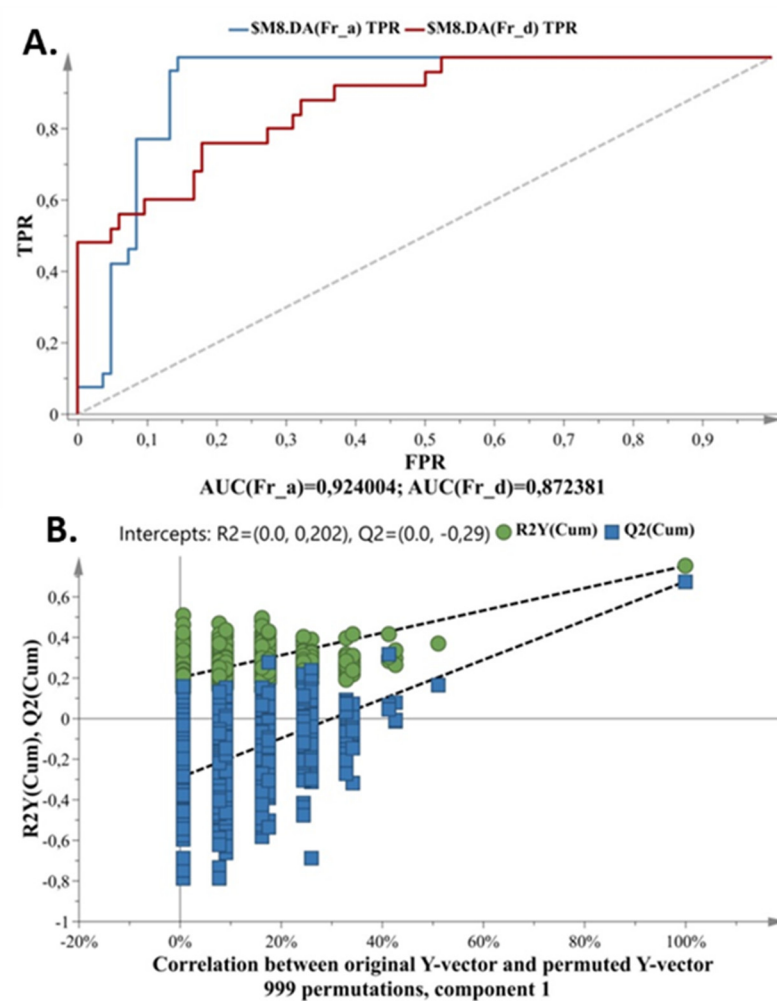

**Figure S12.** (a) ROC curve AUC (Synbiotic formula day 3)= 0.924 and AUC (Synbiotic formula 3<sup>rd</sup> month)=0.872, (b) permutation testing for the OPLS-DA model in Figure 4.

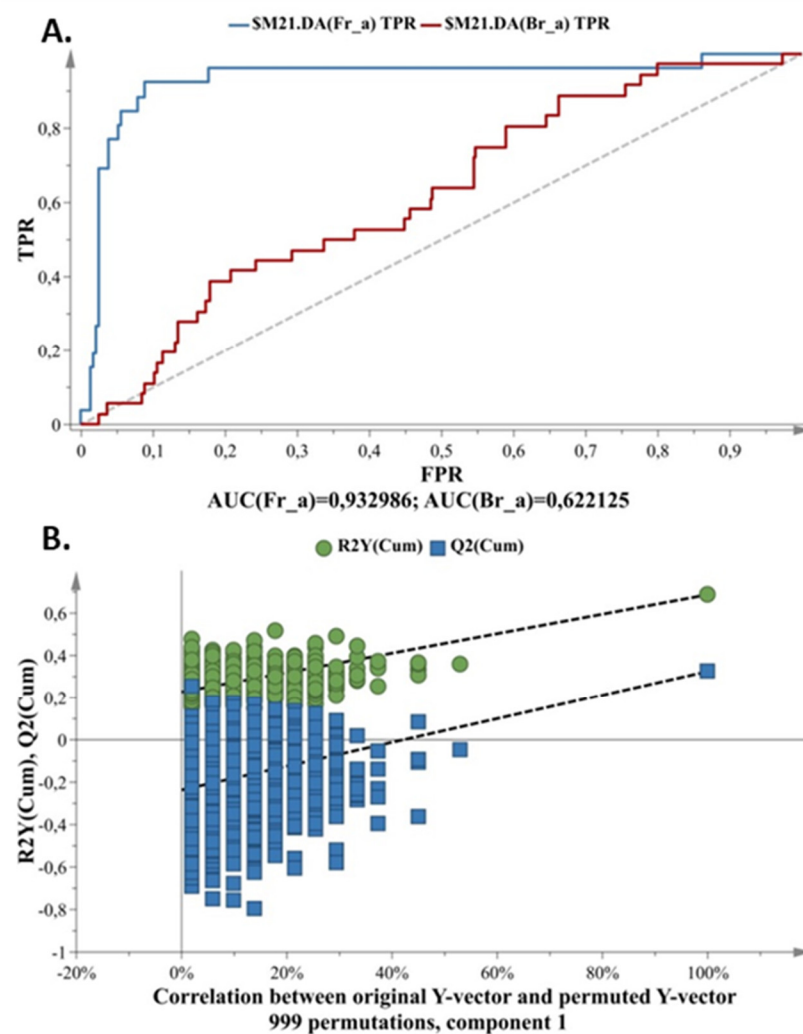

**Figure S13. (a)** ROC curve AUC (Synbiotic formula day 3)= 0.932 and AUC (Breastfeeding day 3)=0.622, **(b)** permutation testing for the OPLS-DA model of breastfeeding vs formula at 3<sup>rd</sup> day.

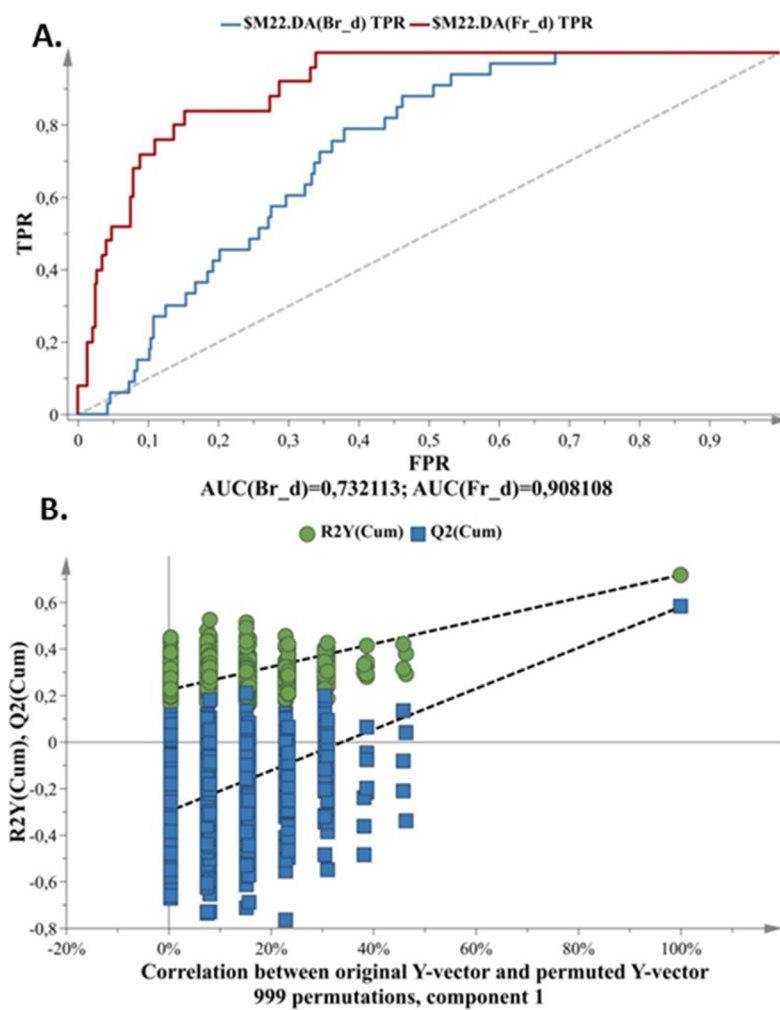

**Figure S14. (a)** ROC curve AUC (Breastfeeding 3<sup>rd</sup> month)= 0.732 and AUC (Synbiotic formula 3<sup>rd</sup> month)=0.908, **(b)** permutation testing for the OPLS-DA model of breastfeeding 3<sup>rd</sup> month vs synbiotic formula 3<sup>rd</sup> month.

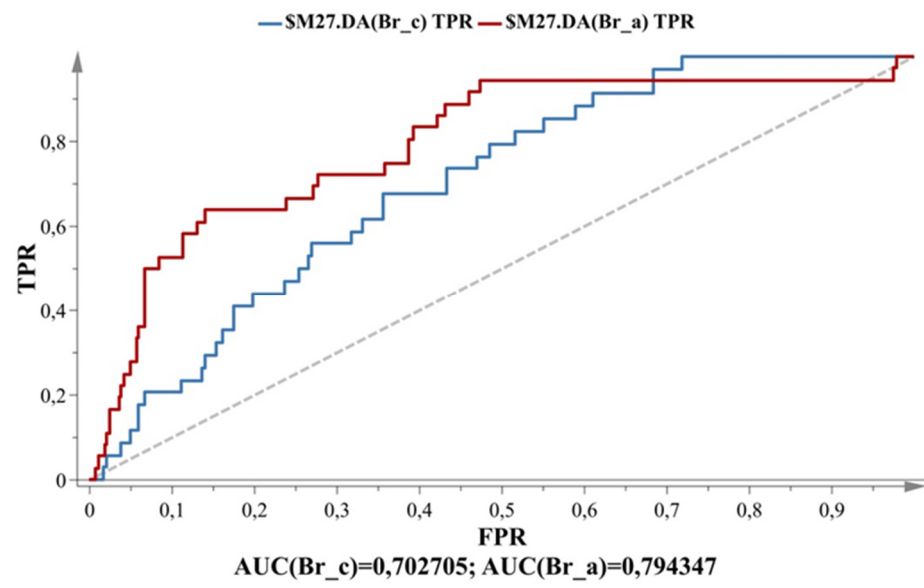

**Figure S15.** ROC curve AUC (Breastfeeding month 2) = 0.702 and AUC (Breastfeeding day 3) = 0.794.

**Table S1.** Validation metrics for Statistical models of Breast-fed: Br vs Formula-fed: Fr at each time point of the study.

|                        | PCA                    | PLS <sup>1</sup>             | OPLS <sup>1</sup>       | OPLS-DA (SIMCA <sup>2</sup> )    |
|------------------------|------------------------|------------------------------|-------------------------|----------------------------------|
| 1st Sampling – Day 3   |                        | R <sup>2</sup> = 0.633       | R <sup>2</sup> = 0.433, | R <sup>2</sup> Y (cum)=0.69,     |
| Br= 36 vs Fr= 26       | R <sup>2</sup> = 0.798 | Q <sup>2</sup> = 0.344       | Q <sup>2</sup> = 0.244  | Q <sup>2</sup> (cum)=0.33        |
| N=62                   |                        | (3 predictors)               | N=62                    | N=51                             |
| 2nd Sampling – Day 15  |                        | R <sup>2</sup> = 0.573       | R <sup>2</sup> = 0.406, | R <sup>2</sup> Y (cum)=0.59,     |
| Br= 34 vs Fr= 31       | R <sup>2</sup> = 0.858 | Q <sup>2</sup> = 0.395       | Q <sup>2</sup> = 0.276  | Q <sup>2</sup> (cum)=0.42        |
| N=65                   |                        | (3 predictors)               | N=65                    | N=57                             |
| 3rd Sampling – Month 2 |                        | <b>R<sup>2</sup> = 0.834</b> | R <sup>2</sup> = 0.69,  | <b>R<sup>2</sup>Y(cum)=0.75,</b> |
| Br= 34 vs Fr= 28       | R <sup>2</sup> = 0.680 | <b>Q<sup>2</sup> = 0.669</b> | Q <sup>2</sup> = 0.343  | <b>Q<sup>2</sup>(cum)=0.58</b>   |
| N=62                   |                        | (4 predictors)               | N=62                    | N=56                             |
| 4th Sampling - Month 3 |                        | <b>R<sup>2</sup> = 0.922</b> | R <sup>2</sup> = 0.574, | <b>R<sup>2</sup>Y(cum)=0.72,</b> |
| Br= 34 vs Fr= 25       | R <sup>2</sup> = 0.676 | <b>Q<sup>2</sup> = 0.781</b> | Q <sup>2</sup> = 0.476  | <b>Q<sup>2</sup>(cum)=0.58</b>   |
| N=59                   |                        | (8 predictors)               | N=59                    | N=54                             |

<sup>1</sup> *p* -value = 0.001 for all R<sup>2</sup> and Q<sup>2</sup> of the PLS and OPLS models. <sup>2</sup> Supervised SIMCA models were generated omitting outliers from the PCA models.



**Table S2.** Validation metrics for statistical models of Breast-fed: Br samples between different time points.

|                                       | PCA        | PLS                                                                           | OPLS                                                           | OPLS-DA (SIMCA <sup>1</sup> )                            |
|---------------------------------------|------------|-------------------------------------------------------------------------------|----------------------------------------------------------------|----------------------------------------------------------|
| Day 3 (n= 36) vs Day 15 (n= 34)       | R2 = 0.843 | R2 = 0.245<br>p-value = 0.05<br>Q2 = 0.018<br>p-value = 0.281(2 predictors)   | R2 = 0.283<br>p-value = 0.173<br>Q2 = 0.04<br>p-value = 0.067  | OPLS: R2 =0.298,<br>Q2 = 0.0338                          |
| Day 3 (n= 36) vs Month 2 (n= 34)      | R2 = 0.813 | R2 = 0.367<br>p-value = 0.003<br>Q2 = 0.267<br>p-value = 0.001 (2 predictors) | R2 = 0.367<br>p-value = 0.003<br>Q2 = 0.25<br>p-value = 0.001  | R2X(cum)=0.61,<br>R2Y(cum)=0.48,<br>Q2(cum)=0.33<br>N=64 |
| Day 3 (n= 36) vs Month 3 (n= 34)      | R2 = 0.791 | R2 = 0.391<br>p-value = 0.001<br>Q2 = 0.264<br>p-value = 0.001 (2 predictors) | R2 = 0.391<br>p-value = 0.001<br>Q2 = 0.201<br>p-value = 0.001 | R2X(cum)=0.57,<br>R2Y(cum)=0.55,<br>Q2(cum)=0.41<br>N=54 |
| Day 15 days (n=34) vs Month 2 (n= 34) | R2 = 0.858 | R2 = 0.227<br>p-value = 0.05<br>Q2 = 0.104<br>p-value = 0.01 (2 predictors)   | R2 = 0.227<br>p-value = 0.05<br>Q2 = 0.113<br>p-value = 0.003  | OPLS: R2 = 0.362,<br>Q2 = 0.183                          |
| Day 15 days (n=34) vs Month 3 (n= 34) | R2 = 0.838 | R2 = 0.351<br>p-value = 0.002<br>Q2 = 0.187<br>p-value = 0.001 (2 predictors) | R2 = 0.267<br>p-value = 0.001<br>Q2 = 0.147<br>p-value = 0.001 | OPLS: R2 = 0.489,<br>Q2 = 0.34                           |
| Month 2 (n=34) vs Month 3 (n= 34)     | R2 = 0.721 | R2 = 0.335<br>p-value = 0.504<br>Q2 = 0.106<br>p-value = 0.104 (2 predictors) | R2 = 0.313<br>p-value = 0.07<br>Q2 = -0.201<br>p-value = 0.652 | -                                                        |

<sup>1</sup>Supervised SIMCA models were generated omitting outliers from the PCA models.

**Table S3.** Validation metrics for statistical models of formula-fed: Fr samples between different time points.

|                                       | PCA        | PLS                                                                              | OPLS                                                           | OPLS-DA (SIMCA <sup>1</sup> )                            |
|---------------------------------------|------------|----------------------------------------------------------------------------------|----------------------------------------------------------------|----------------------------------------------------------|
| Day 3 (n= 26) vs Day 15<br>(n= 31)    | R2 = 0.68  | R2 = 0.516<br>p-value = 0.008<br>Q2 = 0.118<br>p-value = 0.046<br>(3 predictors) | R2 = 0.401<br>p-value = 0.007<br>Q2 = 0.246<br>p-value = 0.002 | OPLS: R2 = 0.401,<br>Q2 = 0.228                          |
| Day 3 (n= 26) vs Month<br>2 (n= 28)   | R2 = 0.613 | R2 = 0.732<br>p-value = 0.001<br>Q2 = 0.416<br>p-value = 0.001<br>(2 predictors) | R2 = 0.732<br>p-value = 0.001<br>Q2 = 0.591<br>p-value = 0.001 | R2X(cum)=0.53,<br>R2Y(cum)=0.75,<br>Q2(cum)=0.55<br>n=53 |
| Day 3 (n= 26) vs Month<br>3 (n= 25)   | R2 = 0.644 | R2 = 0.816<br>p-value = 0.001<br>Q2 = 0.681<br>p-value = 0.001<br>(4 predictors) | R2 = 0.698<br>p-value = 0.001<br>Q2 = 0.639<br>p-value = 0.001 | R2X(cum)=0.51,<br>R2Y(cum)=0.75,<br>Q2(cum)=0.67<br>n=48 |
| Day 15 (n= 31) vs Month<br>2 (n= 28)  | R2 = 0.691 | R2 = 0.36<br>p-value = 0.004<br>Q2 = 0.208<br>p-value = 0.002<br>(2 predictors)  | R2 = 0.36<br>p-value = 0.003<br>Q2 = 0.158<br>p-value = 0.003  | OPLS: R2 = 0.377,<br>Q2 = 0.215                          |
| Day 15 (n= 31) vs Month<br>3 (n= 25)  | R2 = 0.716 | R2 = 0.518<br>p-value = 0.002<br>Q2 = 0.382<br>p-value = 0.001<br>(3 predictors) | R2 = 0.433<br>p-value = 0.001<br>Q2 = 0.405<br>p-value = 0.001 | PCA: R2 = 0.805<br>OPLS: R2 = 0.492,<br>Q2 = 0.386       |
| Month 2 (n= 28) vs<br>Month 3 (n= 25) | R2 = 0.674 | R2 = 0.164<br>p-value = 0.466<br>Q2 = 0.033<br>p-value = 0.091<br>(2 predictors) | R2 = 0.162<br>p-value = 0.462<br>Q2 = 0.024<br>p-value = 0.122 | PCA: R2 = 0.768<br>OPLS: R2 = 0.263,<br>Q2 = 0.106       |

<sup>1</sup>Supervised SIMCA models were generated omitting outliers from the PCA models.

**Table S4. Average nutritional composition per 100 mL of human breast milk and formula (Ron-tamil® Complete 1) [1,2].**

|                                                 | <b>Formula*</b> | <b>Breast<sup>1, 2</sup></b> |
|-------------------------------------------------|-----------------|------------------------------|
| Energy (kcal)                                   | 68              | 63                           |
| Protein (g)                                     | 1.4             | 1.04                         |
| Carbohydrates (g)                               | 7.8             | 7.84                         |
| Fibre (g)                                       | 0.34            | 1.2-1.4                      |
| Fat (g)                                         | 3.4             | 3.0                          |
| Saturated Fatty acids (g)                       | 1.0             | 1.1                          |
| MUFA (g)                                        | 1.71            | 1.4                          |
| PUFA (g)                                        | 0.66            | 0.5                          |
| Linoleic acid (g)                               | 0.52            | 0.4                          |
| $\alpha$ -linolenic acid (mg)                   | 54              | 17.8                         |
| Arachidonic acid -AA (mg)                       | 15.4            | 15.2                         |
| Docosahexaenoic acid – DHA (mg)                 | 15.4            | 7.6                          |
| Minerals                                        |                 |                              |
| calcium (mg)                                    | 47              | 20-25                        |
| phosphorus (mg)                                 | 29              | 12-14                        |
| magnesium (mg)                                  | 5               | 3.0-3.5                      |
| iron (mg)                                       | 0.5             | 0.03-0.07                    |
| zinc ( $\mu$ g)                                 | 0.5             | 0.1-0.3                      |
| manganese ( $\mu$ g)                            | 7.9             | 0.3-0.4                      |
| copper ( $\mu$ g)                               | 50              | 0.01-0.03                    |
| iodine ( $\mu$ g)                               | 12.6            | 14-15                        |
| sodium                                          | 23              | 15-25                        |
| potassium                                       | 74              | 40-55                        |
| chloride                                        | 54              | 40-45                        |
| selenium ( $\mu$ g) 2.71.0-2.5fluoride6.8-Other |                 |                              |

|                                                        |          |
|--------------------------------------------------------|----------|
| total nucleotides (mg)                                 | 2.2      |
| Non-protein nitrogen (g)                               | 0.18     |
| Probiotics ( <i>Bifidobacterium animalis</i> ) (cfu/g) | 1.00E+07 |

\*100mL formula milk is prepared by mixing 13.5 g powder with 90 ml water

**Table S5.** Data comparison between formula-fed and breast-fed groups.

|                                         | <b>Formula-fed</b> | <b>Breast-fed</b> |
|-----------------------------------------|--------------------|-------------------|
| Birth weight Mean (g)                   | 3,287              | 3,298             |
| Birth weight Std Dev (g)                | 410                | 339               |
| Sex Ratio (F/M)                         | 0.78               | 0.59              |
| Delivery Mode Ratio (Physical/Cesarean) | 0.88               | 1.69              |

## References

1. Koletzko, B. Human Milk Lipids. *Ann Nutr Metab* **2016**, 69 Suppl 2, 28–40, doi:10.1159/000452819.
2. Kim, S.Y.; Yi, D.Y. Components of Human Breast Milk: From Macronutrient to Microbiome and MicroRNA. *Clin Exp Pediatr* **2020**, 63, 301–309, doi:10.3345/cep.2020.00059.
